# Supplementary material for: Estimation of cardiorespiratory fitness using heart rate and step count data
Source: PubMed Central journal article supplement (PMC10517160; doi:10.1038/s41598-023-43024-x), 2023-09-22

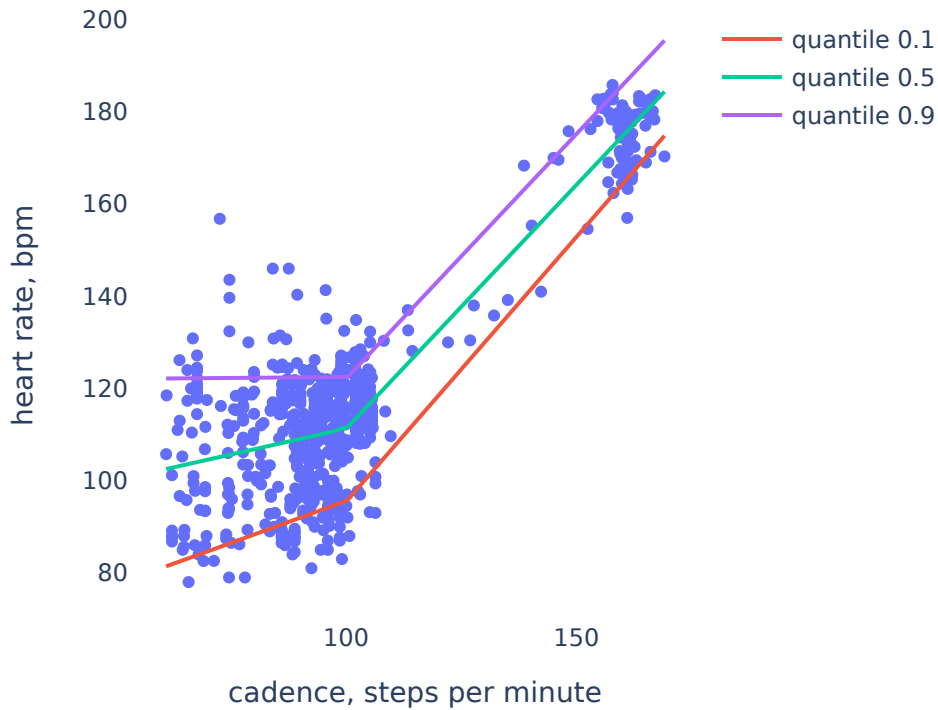

Supplement: 41598_2023_43024_MOESM2_ESM.pdf [file 41598_2023_43024_MOESM2_ESM.pdf]
