# Supplementary material for: Estimation of cardiorespiratory fitness using heart rate and step count data
Source: PubMed Central journal article supplement (PMC10517160; doi:10.1038/s41598-023-43024-x), 2023-09-22
Supplement: 41598_2023_43024_MOESM5_ESM.pdf [file 41598_2023_43024_MOESM5_ESM.pdf]

Impact on predicted IQR

gender

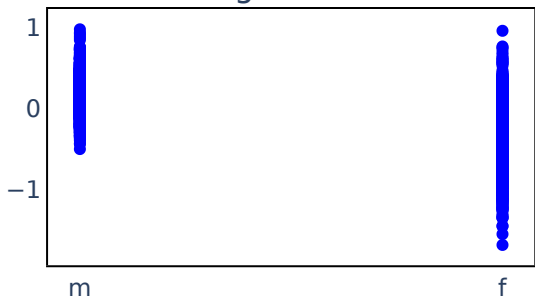

age

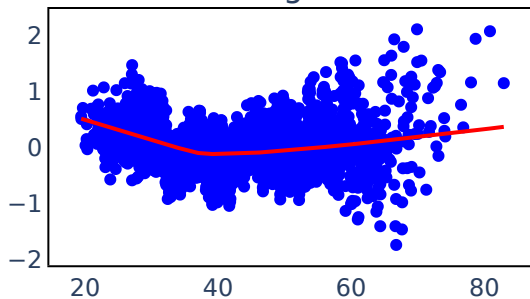

Impact on predicted IQR

bmi

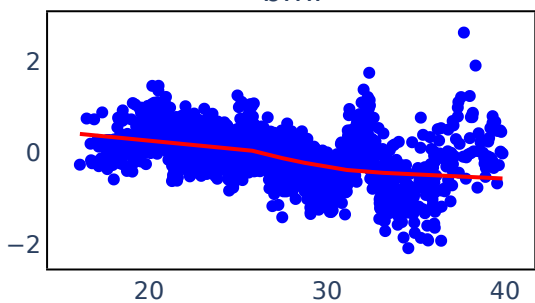

w0<sub>50</sub>

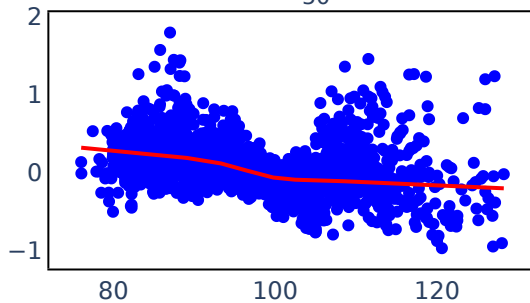

Impact on predicted IQR

w1<sub>50</sub>

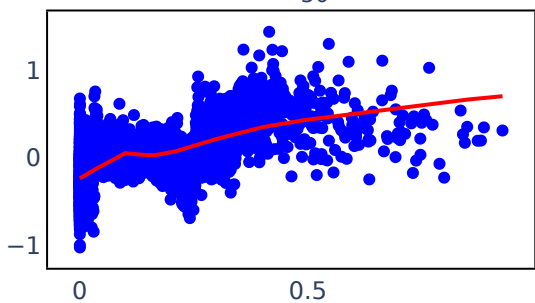

w2<sub>50</sub>

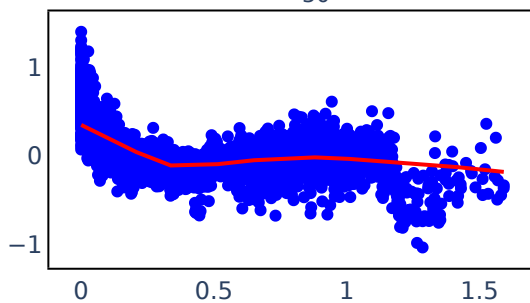

Impact on predicted IQR

chr<sub>75</sub>

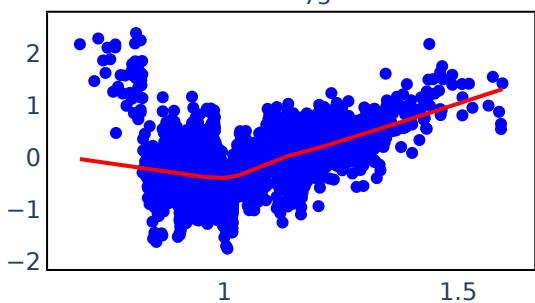

met<sub>75</sub>

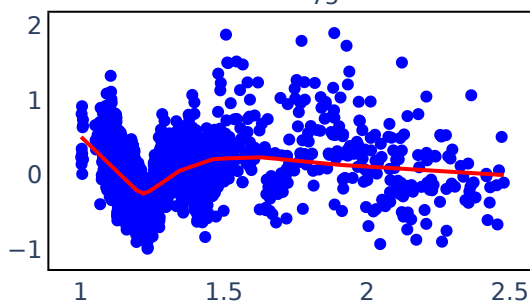

— LOWESS trend
